# Supplementary material
Source: PubMed Central journal article supplement (PMC7786243)
Supplement: jama-e2021369-s001.pdf [file jama-e2021369-s001.pdf]

## Supplementary Online Content

Stowe J, Smith H, Thurland K, Ramsay ME, Andrews N, Ladhani SN. Stillbirths during the COVID-19 pandemic in England, April-June 2020. *JAMA*. doi:10.1001/jama.2020.21369

**eFigure.** A Comparison of Delivery Rates With a Recorded Stillbirth in England in HES and SUS, December 2019 to May 2020

This supplementary material has been provided by the authors to give readers additional information about their work.

**eFigure.** A Comparison of Delivery Rates With a Recorded Stillbirth in England in HES and SUS, December 2019 to May 2020

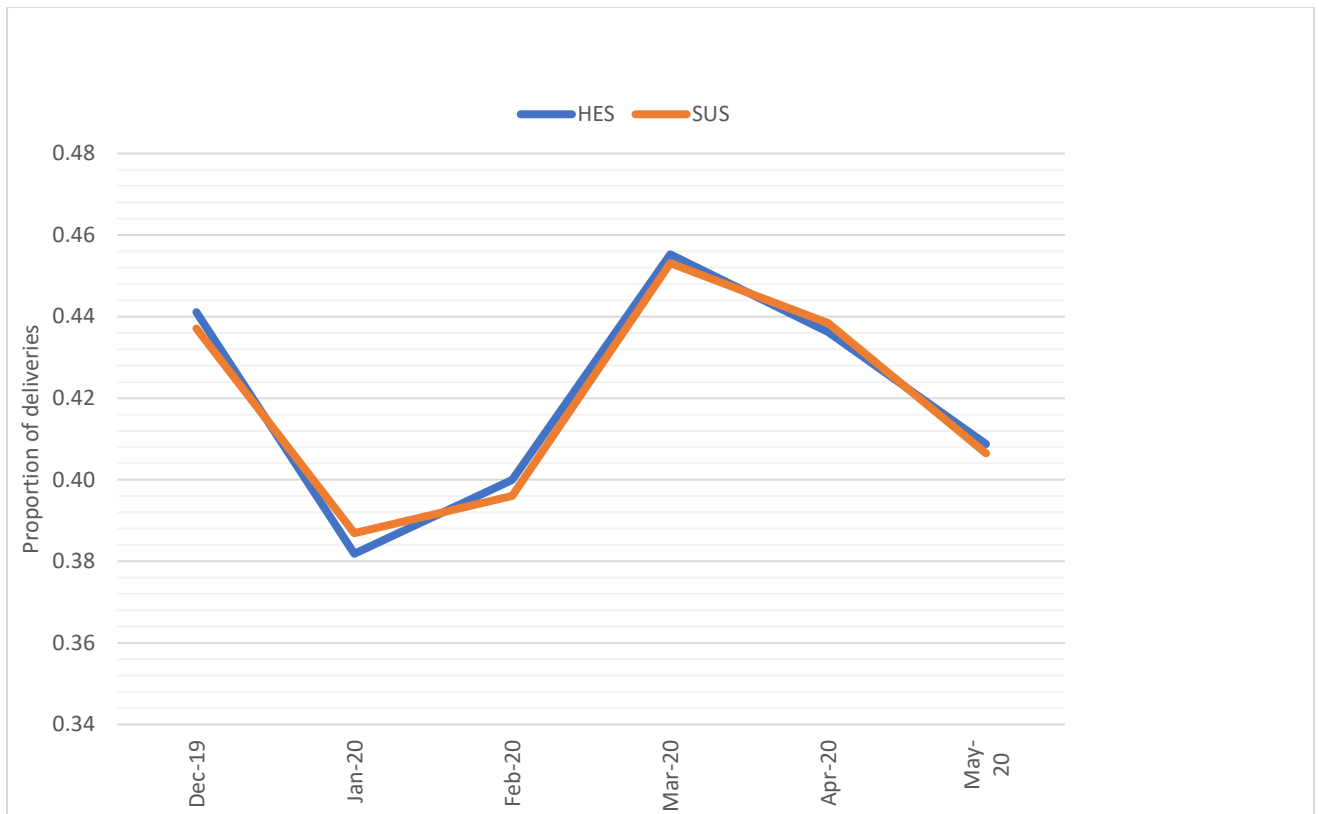

Sources: Hospital Episode Statistics (HES), NHS Digital. Hospital Episode Statistics (HES) Copyright © 2020, re-used with the permission of NHS Digital. All rights reserved (Provisional Data).

Secondary Uses Service (SUS), NHS Digital. Copyright © 2020, Re-used with the permission of NHS Digital. All rights reserved.

Subnational figures have been rounded to the nearest 5, percentages calculated using rounded counts
